# Supplementary material
Source: Elsevier journal article supplement (https://www.sciencedirect.com/science/article/pii/S253006442200061X)
Supplement: mmc2 [file S253006442200061X:mmc2.docx]

**Supporting Information**

Table S1. Permutation analysis of variance (PERMANOVA) of bat assemblages between habitat types. Comparisons of structure (Bray-Curtis Index) and species/sonotypes composition (Jaccard Index) between habitat types are shown. P-values less than 0.05 (highlighted with *) indicate statistically significant dissimilarity.

| Contrast | Activity (Bray-Curtis) | Composition (Jaccard) |
| --- | --- | --- |
| Pasture x Forest | 0.0326* | 0.2374 |
| Pasture x Eucalyptus | 0.0084* | 0.0074* |
| Forest x Eucalyptus | 0.0413* | 0.0267* |

Table S2. Axes description of NMDS analysis calculated to observe the differences in the insectivorous bats assemblage activity between habitat types using the Bray-Curtis Index.

| Habitat type | Axis 1 | Axis 2 |
| --- | --- | --- |
| Forest | -0,33957 | -0,0037848 |
| Forest | -0,08126 | 0,13386 |
| Forest | 0,054503 | 0,25021 |
| Forest | -0,028044 | 0,063301 |
| Forest | -0,13973 | 0,037298 |
| Pasture | -0,076242 | -0,040362 |
| Pasture | -0,22561 | -0,0053227 |
| Pasture | -0,21199 | -0,12182 |
| Pasture | -0,16332 | -0,055312 |
| Pasture | -0,17828 | -0,1321 |
| Eucalyptus | 0,38727 | -0,085564 |
| Eucalyptus | 0,29185 | -0,14743 |
| Eucalyptus | 0,062431 | 0,045211 |
| Eucalyptus | 0,52881 | 0,015205 |
| Eucalyptus | 0,11918 | 0,046614 |

Table S3. Axes description of NMDS analysis calculated to observe the differences in the insectivorous bats assemblage composition between habitat types using the Jaccard Index.

| Habitat type | Axis 1 | Axis 2 |
| --- | --- | --- |
| Forest | -0,1384 | -0,042005 |
| Forest | -0,15623 | 0,011252 |
| Forest | -0,10366 | 0,36995 |
| Forest | -0,11727 | -0,067766 |
| Forest | -0,092115 | 0,010988 |
| Pasture | -0,14319 | -0,052844 |
| Pasture | -0,13493 | -0,046337 |
| Pasture | -0,12461 | -0,04397 |
| Pasture | -0,12919 | -0,05167 |
| Pasture | -0,12564 | -0,043933 |
| Eucalyptus | 0,32736 | -0,16911 |
| Eucalyptus | 0,27322 | -0,23864 |
| Eucalyptus | -0,0706 | -0,0063698 |
| Eucalyptus | 0,54279 | 0,12752 |
| Eucalyptus | 0,19248 | 0,24294 |

Table S4. Species/sonotype of the family Molossidae recorded in the study area and excluded from analyses.

| Species/ Sonotypes | Acoustic records |
| --- | --- |
| *Cynomops* sp. (Thomas, 1920) | 276 |
| *Eumops perotis* (Schinz, 1821) | 42 |
| *Molossops temminckii* (Burmeister, 1854) | 171 |
| *Molossus currentium* (Thomas, 1901) | 68 |
| *Molossus molossus* (Pallas, 1766) | 92 |
| *Promops centralis* (Thomas, 1915) | 33 |
| Molossid 1 | 272 |
